# Supplementary material for: Symmetrical-waveform alternating current-promoted NiOxHy electrocatalysis for the oxygen evolution reaction
Source: Royal Society of Chemistry journal article supplement (doi:10.1039/d3cc02704j), 2023-01-01
Supplement: d3cc02704j1.pdf [file d3cc02704j1.pdf]

## Supporting Information

### **Symmetrical-waveform alternating current-promoted NiO<sub>x</sub>H<sub>y</sub> electrocatalysis for oxygen evolution reaction**

Zhihao Qi,<sup>a</sup> Jinwei Zhuang,<sup>a</sup> Wantong Yang,<sup>a</sup> Yonggang Yang,<sup>a</sup> Ling Wang,<sup>a</sup> Chenyang Cai,<sup>a</sup> Zhilin Zhang,<sup>a</sup> Yutao Hua,<sup>a</sup> Dilnur Abdirazik,<sup>a</sup> Longhua Li,<sup>a</sup> Weidong Shi\*<sup>a</sup> and Jinhui Hao\*<sup>a</sup>

<sup>a</sup>. School of Chemistry and Chemical Engineering, Jiangsu University, Zhenjiang, China

\*Corresponding authors

\*E-mail: swd1978@ ujs.edu.cn; jinhu1\_hao@ujs.edu.cn

## EXPERIMENTAL SECTION

### Materials

Ethanol (AR, 99.7%), potassium hydroxide (KOH, GR), and nickel nitrate hexahydrate ( $\text{Ni}(\text{NO}_3)_2 \cdot 6\text{H}_2\text{O}$ ) were purchased from Sinopharm Chemical Reagent Co. Sodium hydroxide (NaOH, AR) was purchased from Nanjing Chemical Reagent Co. The carbon paper was purchased from Shanghai Hesun Electric Co. The thickness of the carbon paper is 0.20 mm.

### Synthesis of NiO

Carbon paper (2 cm × 2.5 cm) was pretreated by ultrasonic in ethanol and deionized water for 20 min, respectively. 30 mL of 0.5 M  $\text{Ni}(\text{NO}_3)_2$  solution was added to the electrolytic cell, where Ag/AgCl, carbon paper, and glassy carbon were used as the reference, working, and counter electrode, respectively. Electrodeposition was performed at an applied potential of -1.5 V for 100 s. The carbon paper was rinsed with deionized water and dried to obtain the precursors. The precursor was placed in a tube furnace and heated up to 400 °C at a heating rate of 10 °C/min at atmospheric pressure, and held at this temperature for 60 min and cooled to room temperature to obtain the NiO catalyst. The NiO was pre-scanned with LSV technique until the current response stable. This process enables the fully oxidation of surface structure and the obtained electrocatalyst was denoted as  $\text{NiO}_x\text{H}_y$ .

### Synthesis of $\text{NiO}_x\text{H}_y$ -AC-X

In the three-electrode system, Hg/HgO,  $\text{NiO}_x\text{H}_y$  and glassy carbon were used as the reference, working and counter electrodes, respectively. During the SW-AC process, the action time of each potential was 5 s, and the total treatment time was 20 min, during which 120 AC potential cycles were employed.

### In situ Raman measurement of $\text{NiO}_x\text{H}_y$ -AC-X

In the in situ Raman electrolytic cell, Hg/HgO,  $\text{NiO}_x\text{H}_y$  and glass carbon were used as the reference electrode, working electrode and counter electrode, respectively. The working electrode was employed SW-AC with a small frequency of 0.2 Hz. After activation for 20 min, Raman signal was collected under positive or negative potential of SW-AC with interval of 5 s.

### Characterizations

X-ray diffraction (XRD) was performed on Smartlab9 to obtain the crystal structure of the electrocatalyst. Scanning electron microscope (SEM) images were recorded in a Hitachi S-4800 cold field emission scanning electron microscope. Transmission electron microscopy (TEM) and high-resolution transmission electron microscopy (HRTEM) were performed using the TECNAI G2 transmission electron microscope. Electrocatalysts were measured on A300-10/12 for electron paramagnetic resonance (EPR) spectroscopy. X-ray photoelectron spectroscopy (XPS) analysis was performed using Escalab 250Xi. Raman spectroscopy was performed using a QE Pro spectrometer.

## Electrochemical Measurements

The electrochemical measurements were performed on CHI 660E workstation with the prepared electrocatalyst sample as the working electrode, glass carbon as the counter electrode and Hg/HgO as the reference electrode, respectively. A 30 mm diameter proton exchange membrane with a thickness of 183  $\mu\text{m}$  was used to separate the anodic and cathodic. 1 M KOH was purified to remove the trace Fe and used as electrolyte. Cyclic voltammetry (CV) was performed for 20 cycles to obtain a stable current response before recording the data. Linear sweep voltammetry (LSV) curves at a scan rate of 10  $\text{mV s}^{-1}$  were collected. The EIS data were tested at an applied potential of 0.65 V (vs. Hg/HgO) with a frequency range of  $10^{-2}$  -  $10^6$  Hz. The distribution of relaxation times (DRT) was calculated from the EIS data according to the reported method.<sup>1</sup>

The difference in the content of internal and external charges on the active surface of the electrocatalyst can be calculated according to the method in the literature.<sup>2</sup> The total surface charge ( $q_T$ ) is related with the total active surface of the electrocatalyst.  $q_T$  can be divided into inner charge ( $q_i$ ) and outer charge ( $q_o$ ). The calculation formula is as follow:

$$\frac{1}{q_v} = \frac{1}{q_T} + k_1 v^{1/2}$$

where  $v$  is the scan rate,  $q_v$  is the charge measured by the CV curve at scan rate  $v$ ,  $k_1$  is a constant.

By plotting  $1/q_v$  vs  $v^{1/2}$ , the  $q_T$  can be obtained.

$$q_v = q_o + k_2 v^{-1/2}$$

where  $k_2$  is a constant.

By plotting  $q_v$  vs  $v^{-1/2}$ , the  $q_o$  can be obtained.

The effective diffusion coefficient ( $D_{\text{eff}}$ ) of the active species is calculated from the Nernst-Einstein equation.<sup>3</sup> The  $\lambda_m^0$  can be calculated from the solution resistance ( $R_s$ ) and the physical dimensions of electrodes. The EIS data were measured at applied potential of 0.02 V (vs. Hg/HgO), frequency range was chosen from 1-10<sup>4</sup> Hz.

The apparent activation energy ( $E_{\text{app}}$ ) of the electrocatalyst can be calculated from electrochemical tests at different temperatures, and the relationship between current density and apparent activation energy can be expressed by Arrhenius equation:

$$j = A_{\text{app}} \exp\left(-\frac{E_{\text{app}}}{RT}\right)$$

where  $j$  is current density in the CV curve,  $A_{\text{app}}$  is exponential prefactor,  $E_{\text{app}}$  is apparent activation energy,  $R$  is ideal gas constant, and  $T$  is temperature during the CV test.

$E_{\text{app}}$  was calculated according to the following equation:<sup>4</sup>

$$\left| \frac{\partial(\log_{10} j)}{\partial 1/T} \right|_{\eta} = -\frac{E_{\text{app}}}{2.303 R}$$

where  $\eta$  is overpotential.

## DFT calculation

DFT calculation was realized by using the Vienna Ab initio Simulation Package (VASP).<sup>5</sup> Perdew-Burke-Ernzerh (RPBE) within the generalized-gradient approximation (GGA) was used to describe the exchange-correlation energy.<sup>6, 7</sup> The Monkhorst-Pack grids for constructed model was set to 9×9×1. The thickness of the vacuum layer was set to 20 Å.

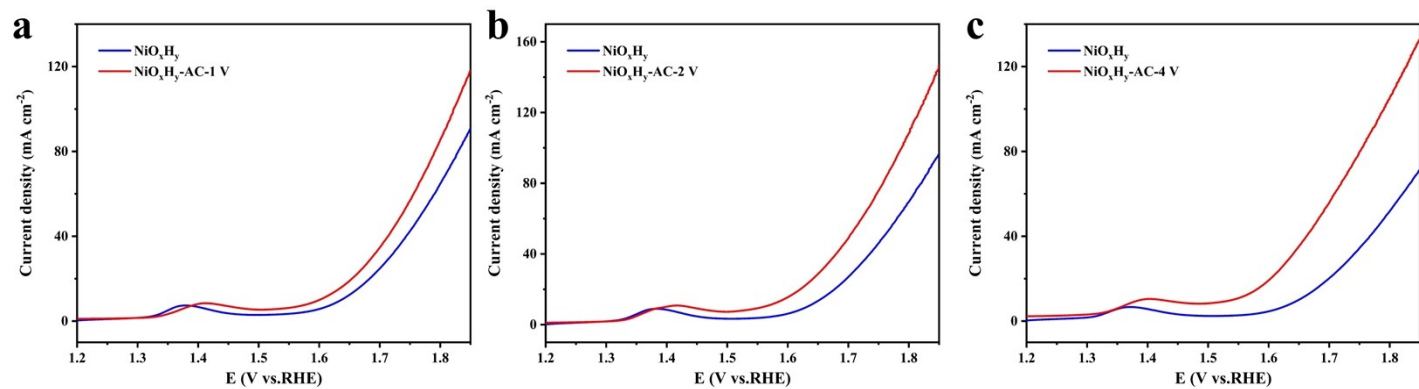

**Fig. S1** LSV curves of  $\text{NiO}_x\text{H}_y$  and  $\text{NiO}_x\text{H}_y\text{-AC-X}$ . (a)  $\text{NiO}_x\text{H}_y\text{-AC-1 V}$ . (b)  $\text{NiO}_x\text{H}_y\text{-AC-2 V}$ . (c)  $\text{NiO}_x\text{H}_y\text{-AC-4 V}$ .

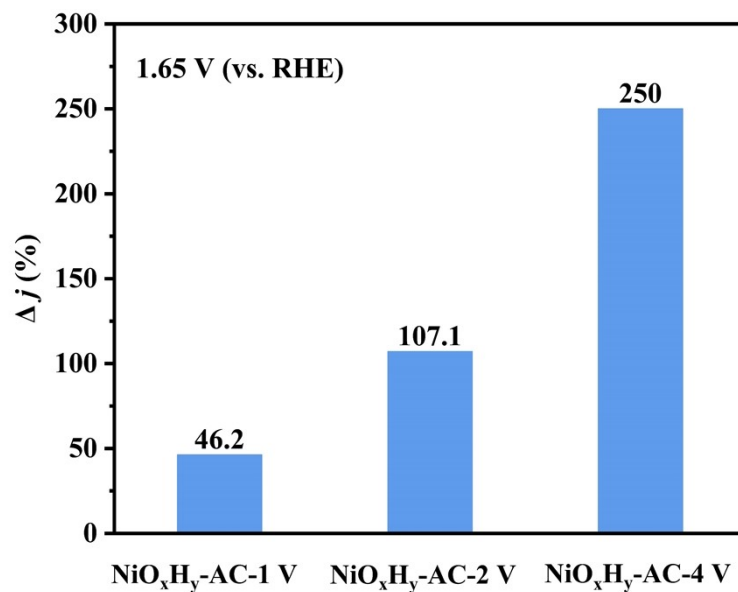

**Fig. S2** Percentage of current density difference ( $\Delta j$ ) after activation of different potential at the onset potential.

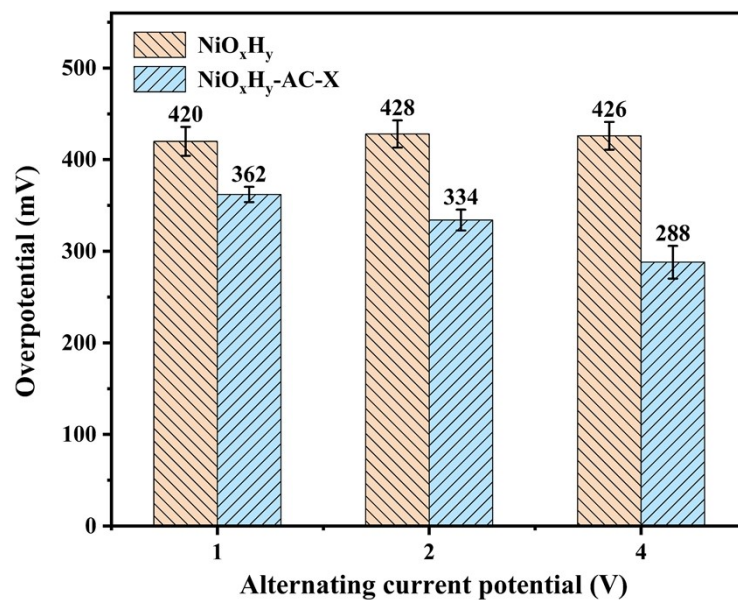

**Fig. S3** Variety of overpotential to achieve the current density of 10 mA cm<sup>-2</sup> before and after SW-AC activation.

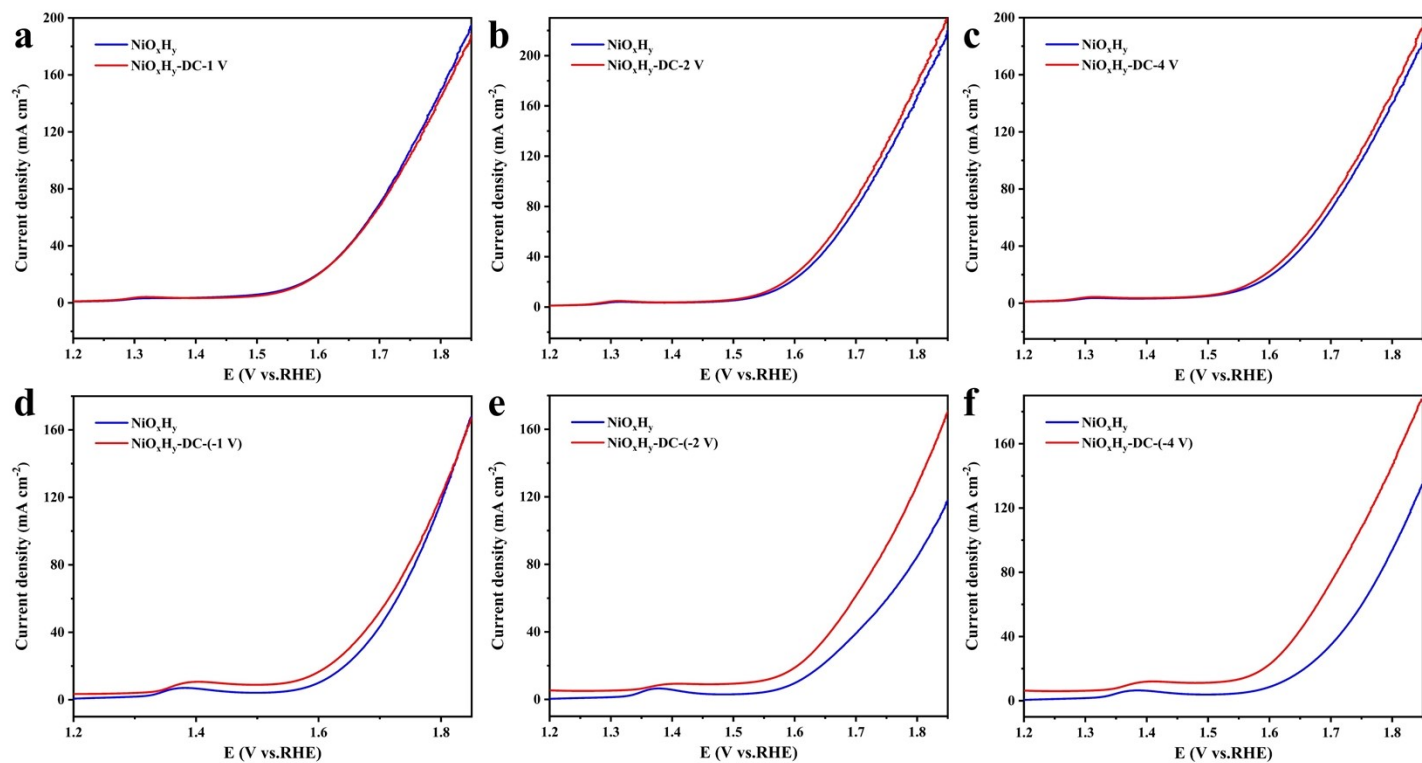

**Fig. S4** Influence of direct current (DC) activation on the LSV performance. (a)  $\text{NiO}_x\text{H}_y$ -DC-1 V. (b)  $\text{NiO}_x\text{H}_y$ -DC-2 V. (c)  $\text{NiO}_x\text{H}_y$ -DC-4 V. (d)  $\text{NiO}_x\text{H}_y$ -DC-(-1 V). (e)  $\text{NiO}_x\text{H}_y$ -DC-(-2 V). (f)  $\text{NiO}_x\text{H}_y$ -DC-(-4 V).



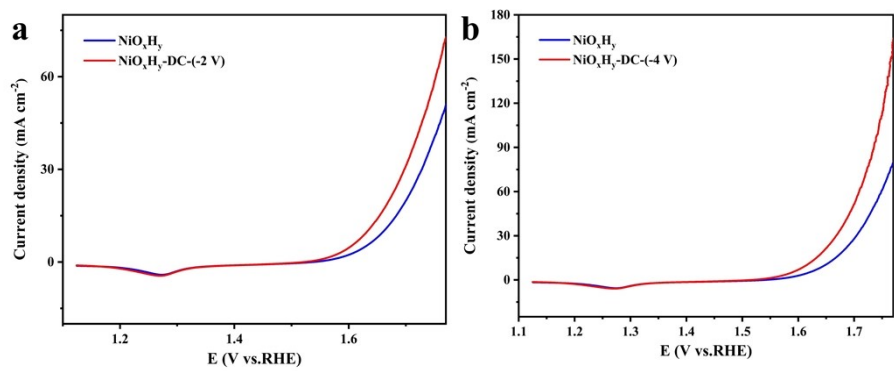

**Fig. S5** Reverse scan LSV curves of (a) NiO<sub>x</sub>H<sub>y</sub>-DC(-2 V). (b) NiO<sub>x</sub>H<sub>y</sub>-DC(-4 V).

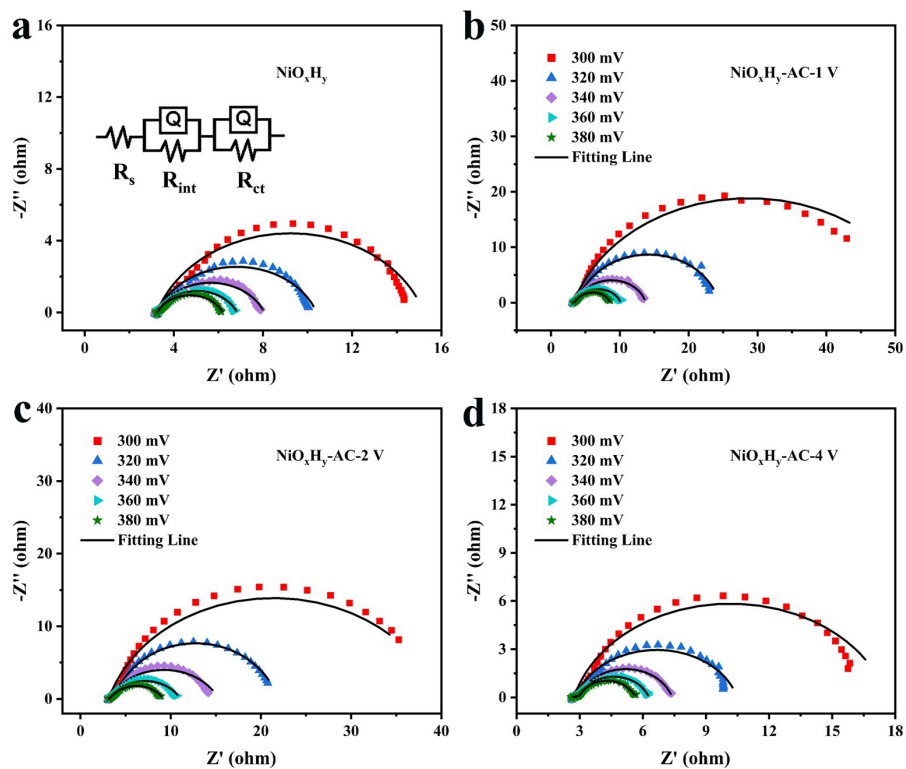

**Fig. S6** Nyquist plots at multiple overpotentials. (a)  $\text{NiO}_x\text{H}_y$ . (b)  $\text{NiO}_x\text{H}_y\text{-AC-1 V}$ . (c)  $\text{NiO}_x\text{H}_y\text{-AC-2 V}$ . (d)  $\text{NiO}_x\text{H}_y\text{-AC-4 V}$ . The inset of (a) shows the two-constant equivalent circuit for simulation.

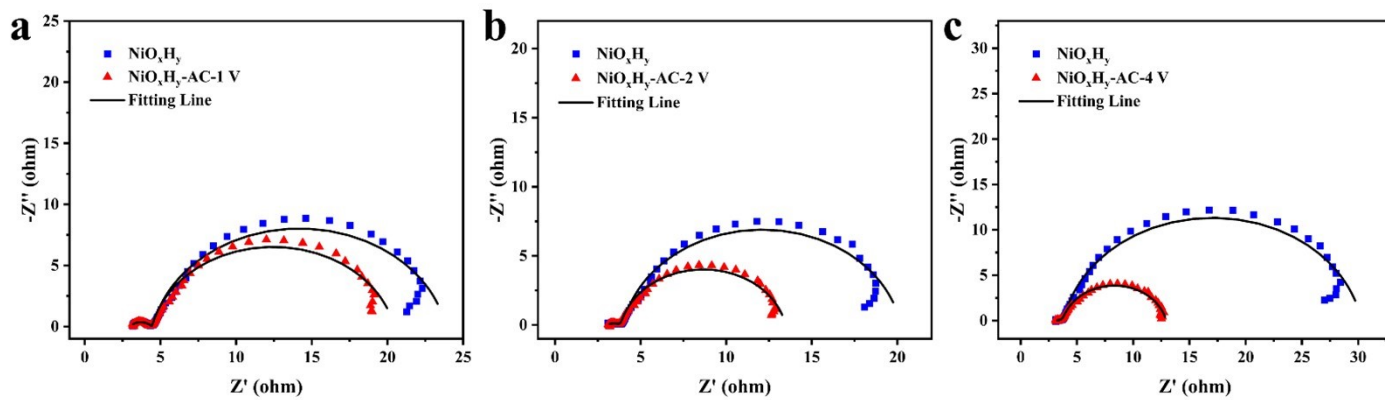

**Fig. S7** Nyquist plots of  $\text{NiO}_x\text{H}_y$  and  $\text{NiO}_x\text{H}_y\text{-AC-X}$ . (a)  $\text{NiO}_x\text{H}_y\text{-AC-1 V}$ . (b)  $\text{NiO}_x\text{H}_y\text{-AC-2 V}$ .

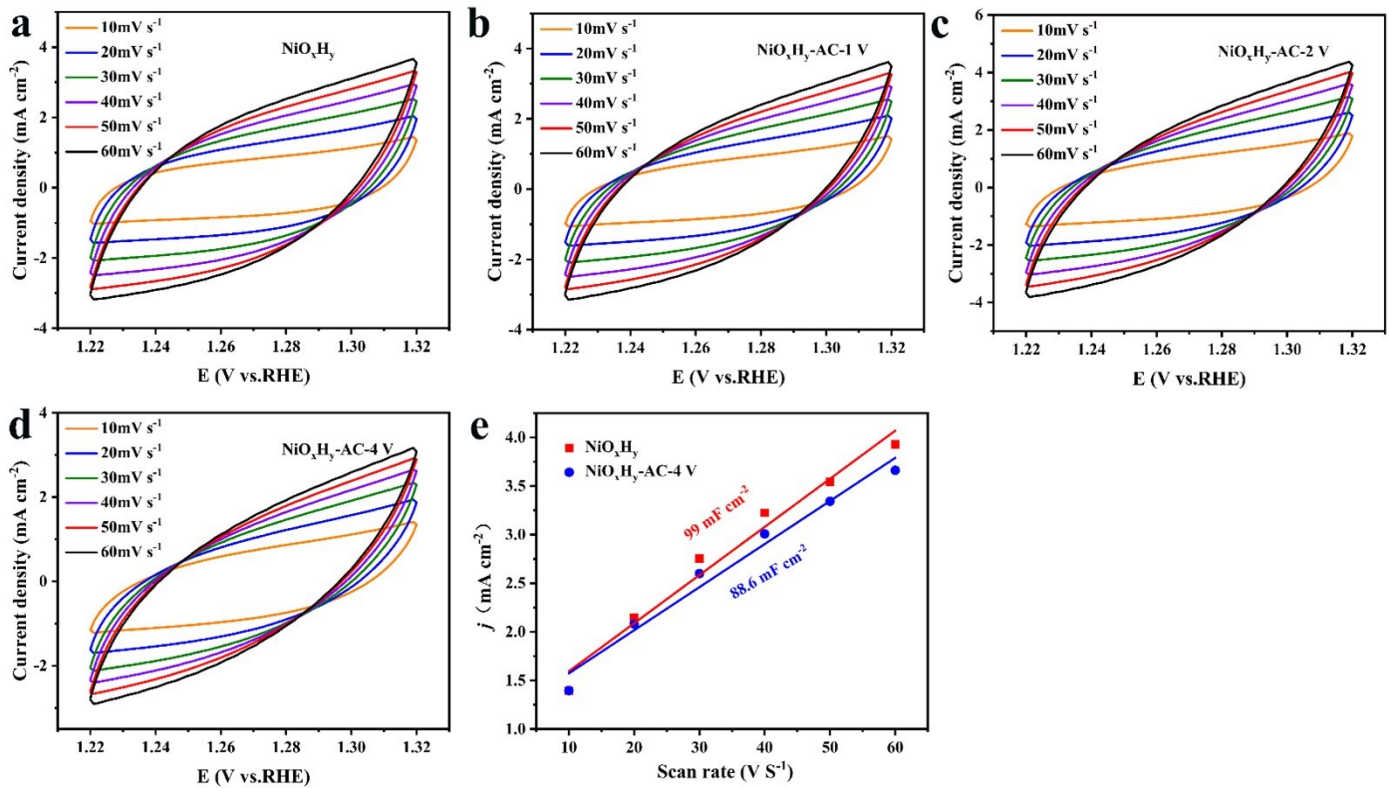

**Fig. S8** CV curves of  $\text{NiO}_x\text{H}_y$  and  $\text{NiO}_x\text{H}_y\text{-AC-X}$ . (a)  $\text{NiO}_x\text{H}_y$ . (b)  $\text{NiO}_x\text{H}_y\text{-AC-1V}$ . (c)  $\text{NiO}_x\text{H}_y\text{-AC-2 V}$ . (d)  $\text{NiO}_x\text{H}_y\text{-AC-4 V}$ . (e)

Correlation between current density difference ( $\Delta j$ ) and scan rate at applied potential of 1.27 V.

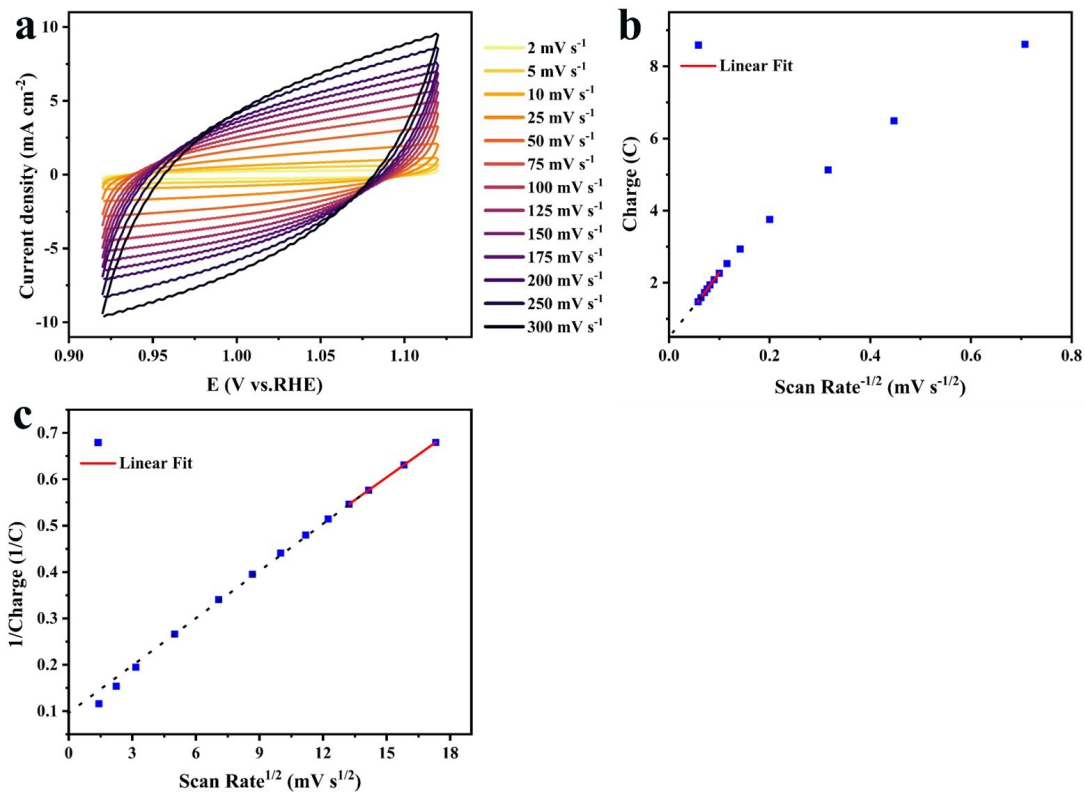

**Fig. S9** (a) CV curves for calculating the  $q_T$  and  $q_O$ . (b) Charge plotted against the scan rate<sup>-1/2</sup>, the intercept of the y-axis in fitting curve is calculated to be  $q_O$ . (c) 1/charge plotted against the scan rate<sup>1/2</sup>, the y-axis 1/intercept in fitting curve is calculated to be  $q_T$ .

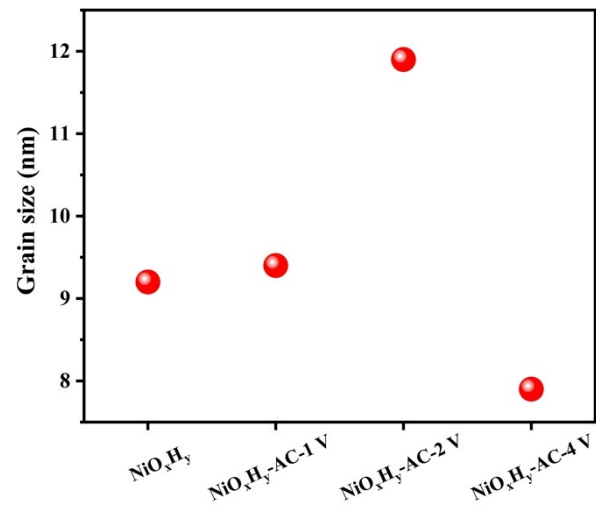

**Fig. S10** The grain size diagram of  $\text{NiO}_x\text{H}_y$  and  $\text{NiO}_x\text{H}_y\text{-AC-X}$ .

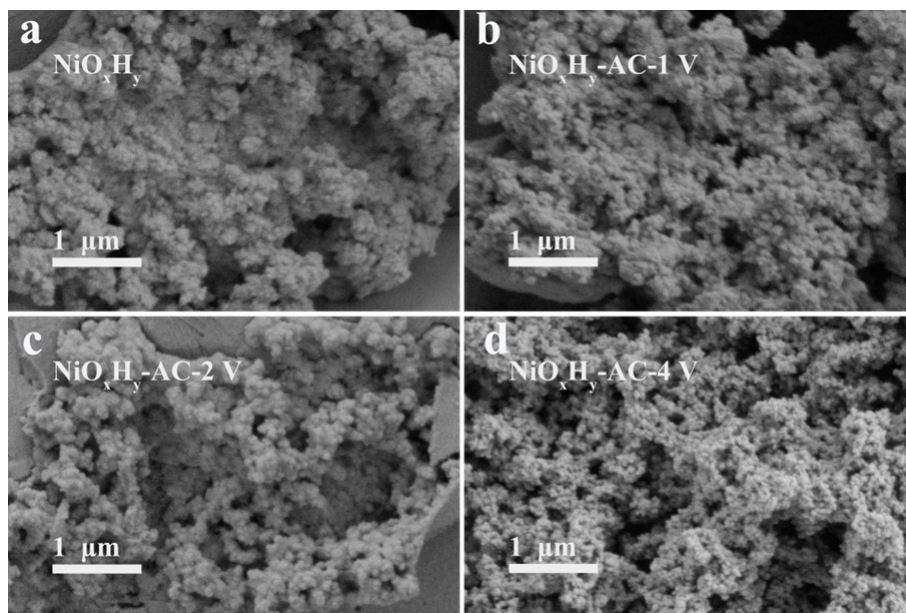

**Fig. S11** SEM image of  $\text{NiO}_x\text{H}_y$  (a),  $\text{NiO}_x\text{H}_y\text{-AC-1 V}$  (b),  $\text{NiO}_x\text{H}_y\text{-AC-2 V}$  (c), and  $\text{NiO}_x\text{H}_y\text{-AC-4 V}$  (d).

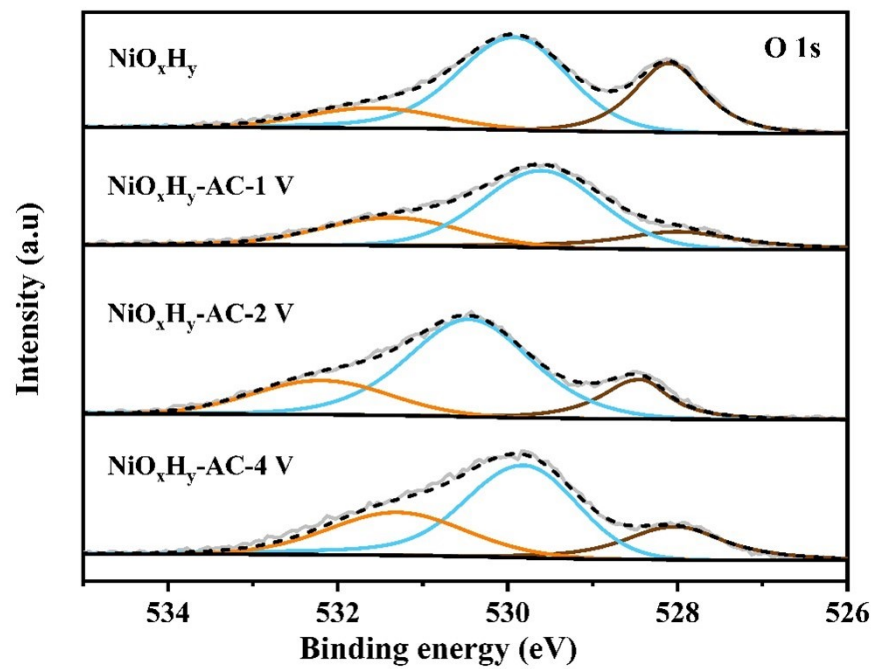

Fig. S12 O 1S XPS spectra of  $\text{NiO}_x\text{H}_y$  and  $\text{NiO}_x\text{H}_y\text{-AC-X}$ .



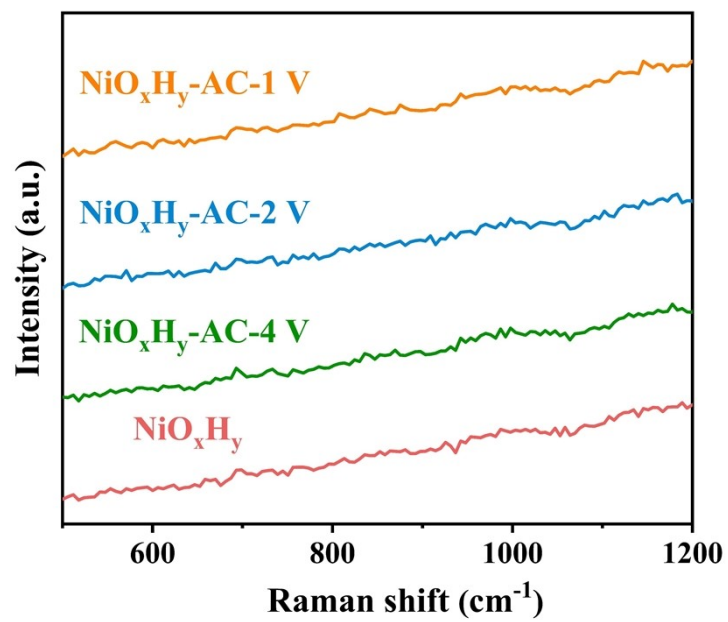

**Fig. S13** In situ Raman spectra of NiO<sub>x</sub>H<sub>y</sub> and NiO<sub>x</sub>H<sub>y</sub>-AC-X collected at negative potential of SW-AC.

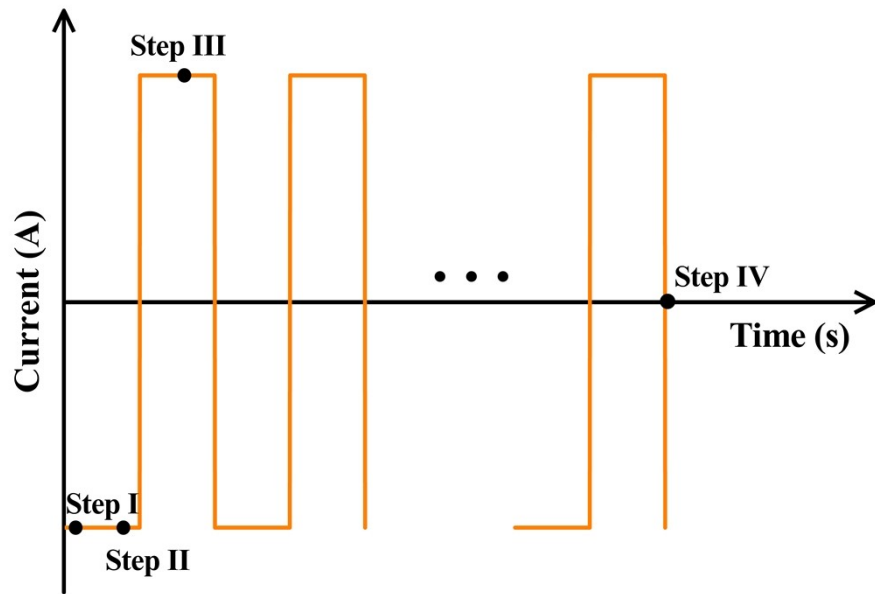

**Fig. S14** Illustration of  $i$ - $t$  curve during SW-AC activation.

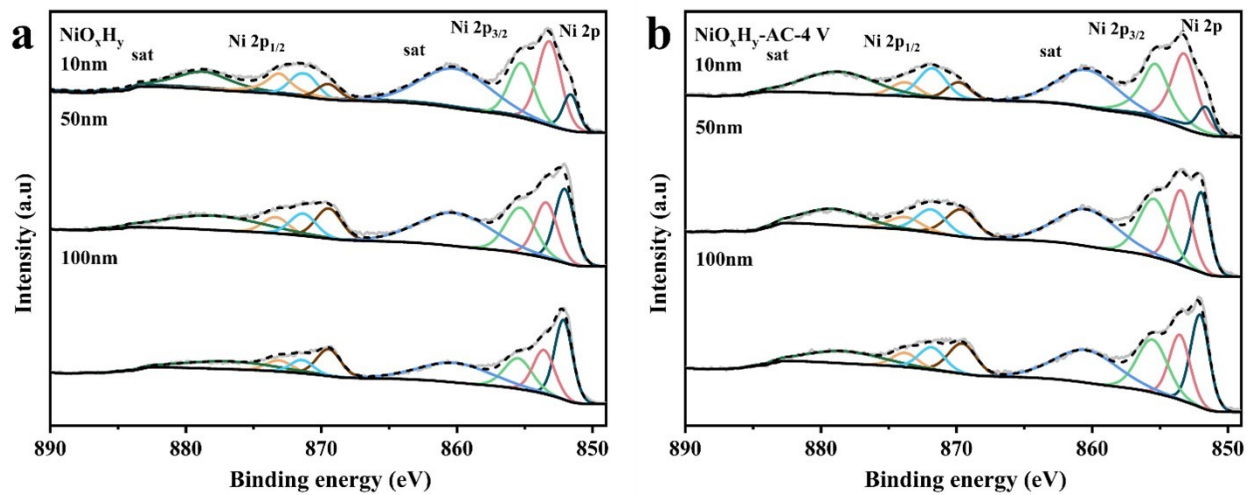

**Fig. S15** Ni 2p XPS at different etching degree of  $\text{NiO}_x\text{H}_y$  (a) and  $\text{NiO}_x\text{H}_y\text{-AC-4V}$  (b).

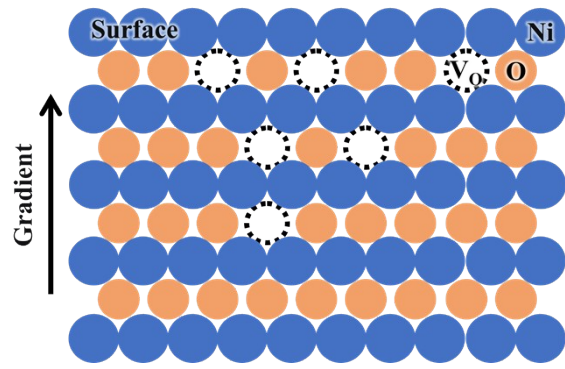

**Fig. S16**  $V_O$  distribution diagram of  $NiO_xH_y$ -AC-4V.

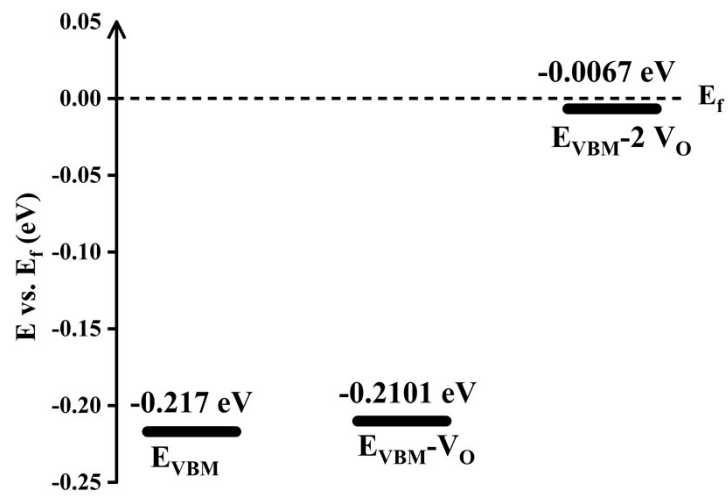

**Fig. S17**  $E_{\text{VBM}}$  of  $\text{NiO}_x\text{H}_y$ ,  $\text{NiO}_x\text{H}_y\text{-V}_\text{O}$ , and  $\text{NiO}_x\text{H}_y\text{-2V}_\text{O}$ .

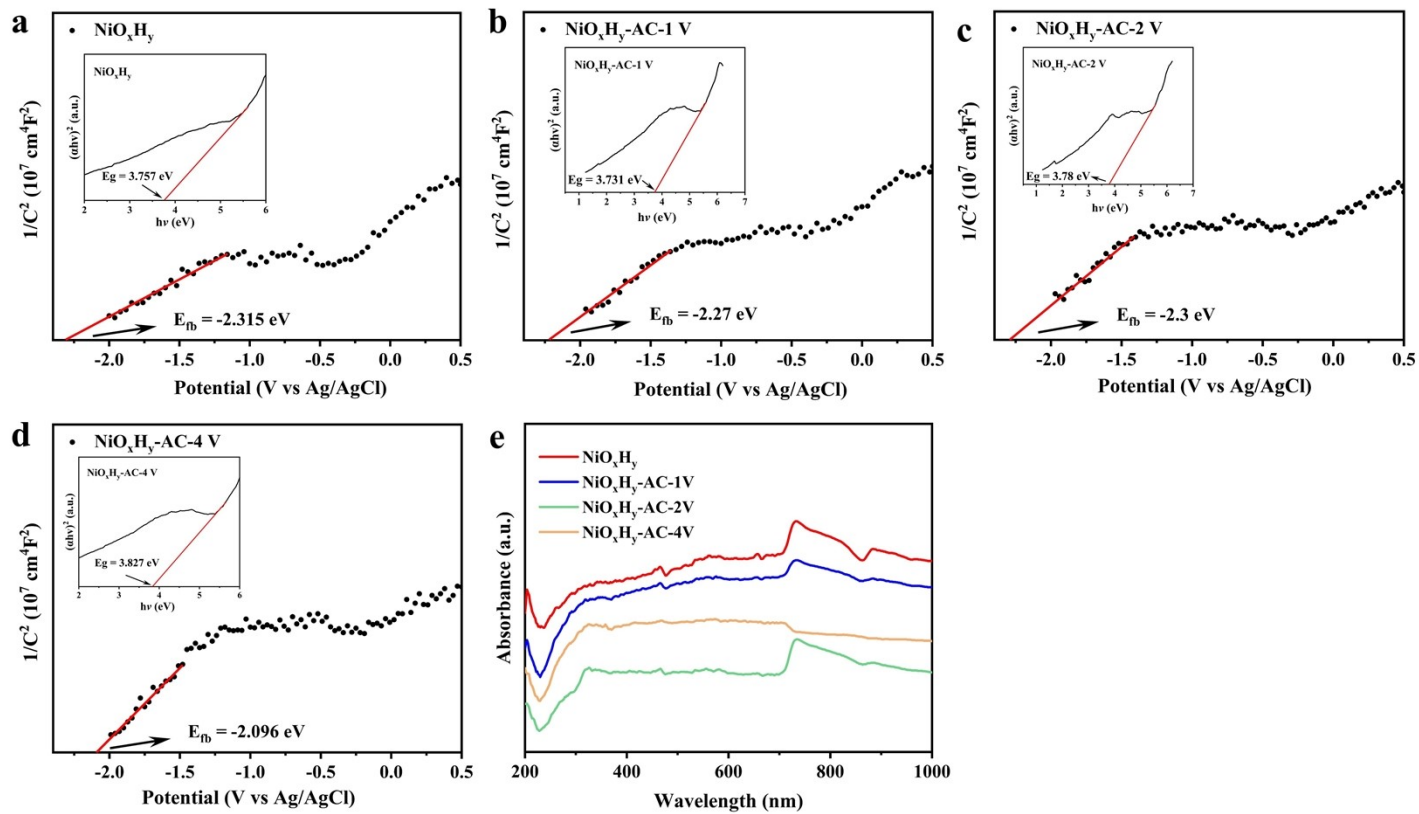

**Fig. S18** Mott-Schottky plots of (a)  $\text{NiO}_x\text{H}_y$ . (b)  $\text{NiO}_x\text{H}_y\text{-AC-1}$ . (c)  $\text{NiO}_x\text{H}_y\text{-AC-2 V}$ . (d)  $\text{NiO}_x\text{H}_y\text{-AC-4 V}$  and the inset is  $E_g$  diagram. (e) UV-vis DRS spectra of  $\text{NiO}_x\text{H}_y$  and  $\text{NiO}_x\text{H}_y\text{-AC-X}$ .

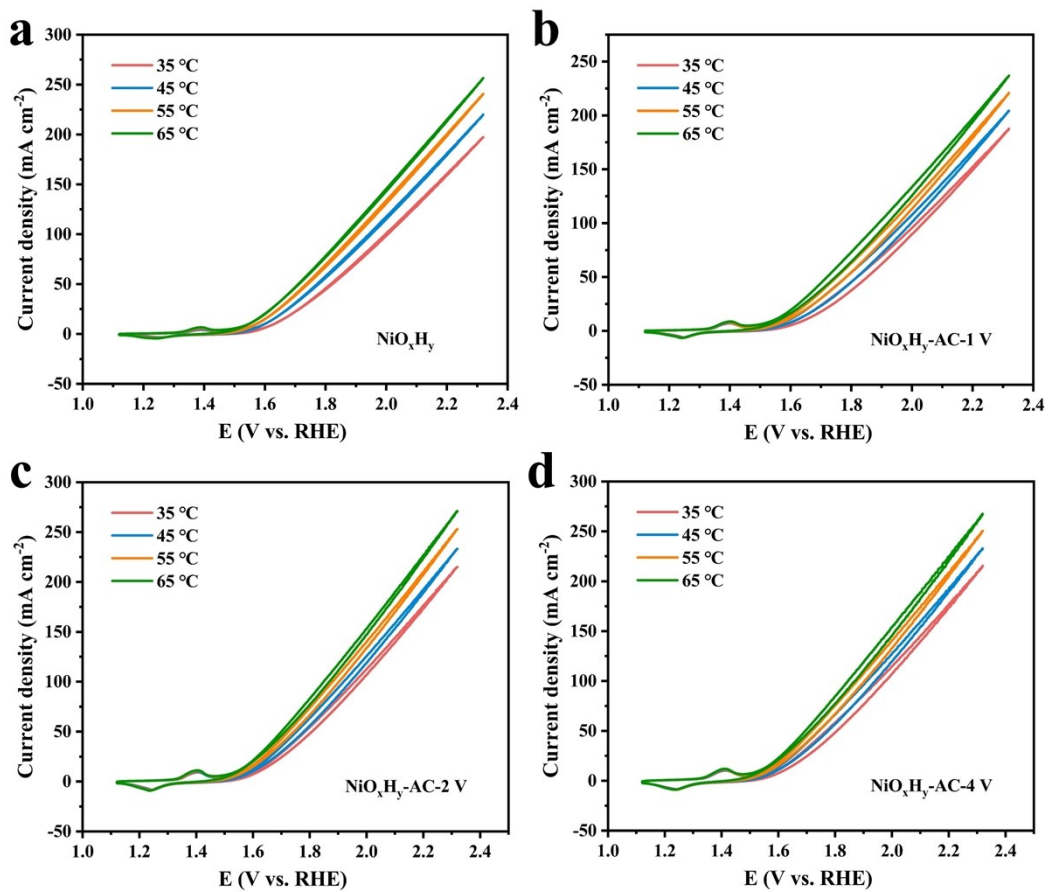

**Fig. S19** CV curves of NiO<sub>x</sub>H<sub>y</sub> (a), NiO<sub>x</sub>H<sub>y</sub>-AC-1V (b), NiO<sub>x</sub>H<sub>y</sub>-AC-2V (c) and NiO<sub>x</sub>H<sub>y</sub>-AC-4V (d) at different temperatures.

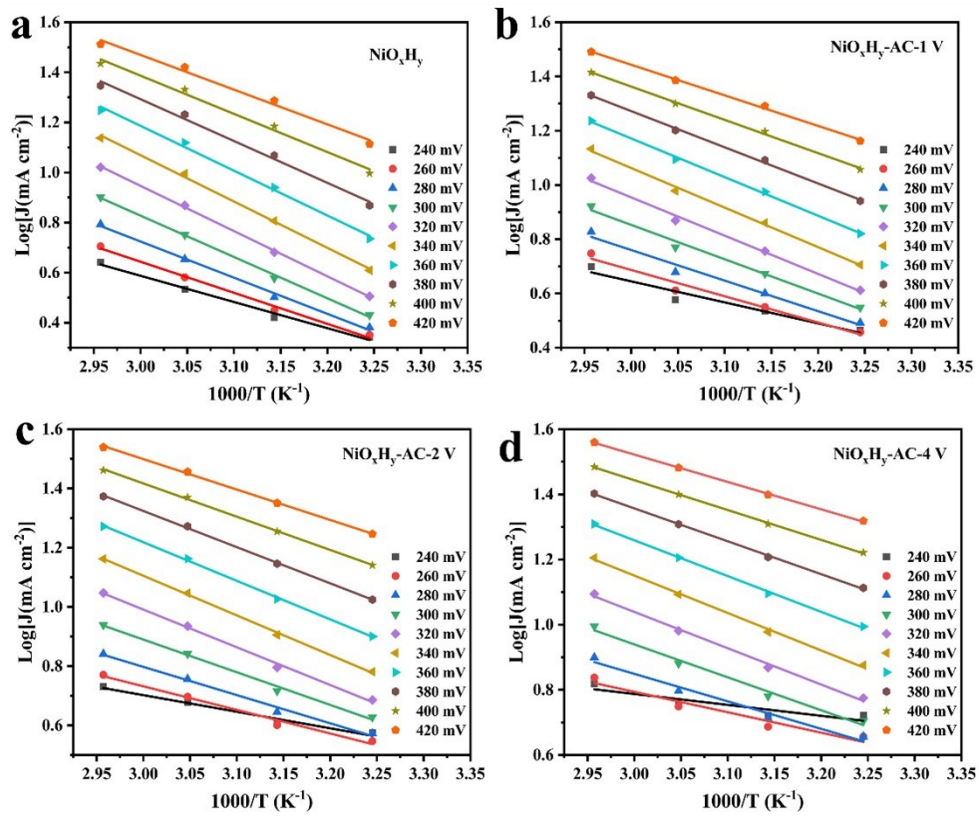

**Fig. S20**  $\text{Log}(j)$  plotted against  $1000/T$  (a).  $\text{NiO}_x\text{H}_y$  (b).  $\text{NiO}_x\text{H}_y\text{-AC-1V}$  (c).  $\text{NiO}_x\text{H}_y\text{-AC-2V}$  (d).  $\text{NiO}_x\text{H}_y\text{-AC-4V}$ .



**Table S1.** EIS fitting data of NiO<sub>x</sub>H<sub>y</sub>.  $\eta$  is overpotential.

| $\eta$ (mV) | $R_1$ ( $\Omega$ ) | $R_{int}$ ( $\Omega$ ) | $CPE_1-T$<br>( $F^{-1}\cdot s^{1-n}$ ) | $CPE_1-P$ | $R_{ct}$ ( $\Omega$ ) | $CPE_2-T$<br>( $F^{-1}\cdot s^{1-n}$ ) | $CPE_2-P$ |
|-------------|--------------------|------------------------|----------------------------------------|-----------|-----------------------|----------------------------------------|-----------|
| <b>340</b>  | 3.169              | 0.802                  | 0.150                                  | 0.541     | 10.7                  | 0.0690                                 | 0.909     |
| <b>360</b>  | 3.18               | 0.464                  | 0.0701                                 | 0.633     | 6.495                 | 0.0654                                 | 0.884     |
| <b>380</b>  | 3.189              | 0.383                  | 0.0506                                 | 0.666     | 4.316                 | 0.0642                                 | 0.874     |
| <b>400</b>  | 3.205              | 0.332                  | 0.0370                                 | 0.700     | 3.176                 | 0.0626                                 | 0.869     |
| <b>420</b>  | 3.216              | 0.342                  | 0.0389                                 | 0.687     | 2.529                 | 0.0612                                 | 0.878     |

**Table S2.** EIS fitting data of NiO<sub>x</sub>H<sub>y</sub>-1 V.

| $\eta$ (mV) | $R_1$ ( $\Omega$ ) | $R_{int}$ ( $\Omega$ ) | $CPE_{1-T}$<br>( $F^{-1}\cdot s^{1-n}$ ) | $CPE_{1-P}$ | $R_{ct}$ ( $\Omega$ ) | $CPE_{2-T}$<br>( $F^{-1}\cdot s^{1-n}$ ) | $CPE_{2-P}$ |
|-------------|--------------------|------------------------|------------------------------------------|-------------|-----------------------|------------------------------------------|-------------|
| <b>300</b>  | 3.122              | 57.3                   | 0.394                                    | 0.364       | 37.39                 | 0.101                                    | 0.942       |
| <b>320</b>  | 3.162              | 3.194                  | 0.293                                    | 0.405       | 18.44                 | 0.0871                                   | 0.924       |
| <b>340</b>  | 3.18               | 0.942                  | 0.182                                    | 0.453       | 9.64                  | 0.0765                                   | 0.875       |
| <b>360</b>  | 3.194              | 0.427                  | 0.0546                                   | 0.598       | 6.497                 | 0.0732                                   | 0.817       |
| <b>380</b>  | 3.205              | 0.374                  | 0.0394                                   | 0.635       | 5.02                  | 0.0715                                   | 0.807       |

**Table S3.** EIS fitting data of NiO<sub>x</sub>H<sub>y</sub>-2 V.

| $\eta$ (mV) | $R_1$ ( $\Omega$ ) | $R_{int}$ ( $\Omega$ ) | $CPE_{1-T}$<br>( $F^{-1}\cdot s^{1-n}$ ) | $CPE_{1-P}$ | $R_{ct}$ ( $\Omega$ ) | $CPE_{2-T}$<br>( $F^{-1}\cdot s^{1-n}$ ) | $CPE_{2-P}$ |
|-------------|--------------------|------------------------|------------------------------------------|-------------|-----------------------|------------------------------------------|-------------|
| <b>300</b>  | 3.02               | 17.12                  | 0.298                                    | 0.433       | 27.35                 | 0.126                                    | 0.979       |
| <b>320</b>  | 3.064              | 5.04                   | 0.260                                    | 0.431       | 14.48                 | 0.108                                    | 0.958       |
| <b>340</b>  | 3.101              | 1.373                  | 0.188                                    | 0.445       | 9.984                 | 0.0879                                   | 0.890       |
| <b>360</b>  | 3.114              | 0.756                  | 0.112                                    | 0.492       | 6.762                 | 0.0828                                   | 0.839       |
| <b>380</b>  | 3.12               | 0.663                  | 0.0955                                   | 0.499       | 5.081                 | 0.0815                                   | 0.821       |

**Table S4.** EIS fitting data of NiO<sub>x</sub>H<sub>y</sub>-4 V.

| $\eta$ (mV) | $R_1$ ( $\Omega$ ) | $R_{int}$ ( $\Omega$ ) | $CPE_{1-T}$<br>( $F^{-1}\cdot s^{1-n}$ ) | $CPE_{1-P}$ | $R_{ct}$ ( $\Omega$ ) | $CPE_{2-T}$<br>( $F^{-1}\cdot s^{1-n}$ ) | $CPE_{2-P}$ |
|-------------|--------------------|------------------------|------------------------------------------|-------------|-----------------------|------------------------------------------|-------------|
| <b>300</b>  | 2.637              | 2.741                  | 0.653                                    | 0.362       | 14.85                 | 0.129                                    | 0.848       |
| <b>320</b>  | 2.669              | 1.02                   | 0.589                                    | 0.314       | 7.354                 | 0.120                                    | 0.867       |
| <b>340</b>  | 2.658              | 0.730                  | 0.601                                    | 0.254       | 4.105                 | 0.123                                    | 0.880       |
| <b>360</b>  | 2.626              | 0.731                  | 0.596                                    | 0.201       | 3.059                 | 0.118                                    | 0.865       |
| <b>380</b>  | 2.404              | 4.647                  | 1.026                                    | 0.0761      | 2.317                 | 0.112                                    | 0.884       |

**Table S5.** EIS fitting data of NiO<sub>x</sub>H<sub>y</sub> before and after SW-AC activation at different potentials.

| Sample |                                         | R <sub>1</sub> (Ω) | R <sub>int</sub> (Ω) | CPE <sub>1-T</sub> (F <sup>-1</sup> ·s <sup>1-n</sup> ) | CPE <sub>1-P</sub> | R <sub>ct</sub> (Ω) | CPE <sub>2-T</sub> (F <sup>-1</sup> ·s <sup>1-n</sup> ) | CPE <sub>2-P</sub> |
|--------|-----------------------------------------|--------------------|----------------------|---------------------------------------------------------|--------------------|---------------------|---------------------------------------------------------|--------------------|
| 1      | NiO <sub>x</sub> H <sub>y</sub>         | 2.923              | 1.594                | 0.000401                                                | 0.558              | 19.04               | 0.0513                                                  | 0.886              |
|        | NiO <sub>x</sub> H <sub>y</sub> -AC-1 V | 2.942              | 1.511                | 0.000482                                                | 0.552              | 15.79               | 0.0593                                                  | 0.875              |
| 2      | NiO <sub>x</sub> H <sub>y</sub>         | 2.513              | 1.619                | 0.0254                                                  | 0.228              | 15.82               | 0.0676                                                  | 0.907              |
|        | NiO <sub>x</sub> H <sub>y</sub> -AC-2 V | 2.966              | 0.976                | 0.0422                                                  | 0.282              | 9.467               | 0.0831                                                  | 0.892              |
| 3      | NiO <sub>x</sub> H <sub>y</sub>         | 0.000211           | 11.07                | 0.155                                                   | 0.0236             | 25.92               | 0.0405                                                  | 0.9104             |
|        | NiO <sub>x</sub> H <sub>y</sub> -AC-4 V | 3.143              | 1.308                | 0.372                                                   | 0.212              | 8.724               | 0.057                                                   | 0.905              |

**Table S6.** Peaks position in Ni 2p XPS spectrum of NiO<sub>x</sub>H<sub>y</sub> and NiO<sub>x</sub>H<sub>y</sub>-AC-X.

| Ni 2p                                   | Satellite |        | Ni <sup>3+</sup> |        | Ni <sup>2+</sup> |        |
|-----------------------------------------|-----------|--------|------------------|--------|------------------|--------|
|                                         | position  |        | position         |        | position         |        |
| NiO <sub>x</sub> H <sub>y</sub>         | 877.90    | 859.58 | 871.94           | 854.42 | 870.02           | 852.68 |
| NiO <sub>x</sub> H <sub>y</sub> -AC-1 V | 878.7     | 859.86 | 871.98           | 854.82 | 869.64           | 852.96 |
| NiO <sub>x</sub> H <sub>y</sub> -AC-2 V | 878.58    | 860.04 | 872.04           | 854.52 | 869.82           | 852.54 |
| NiO <sub>x</sub> H <sub>y</sub> -AC-4 V | 878.63    | 860.15 | 872.51           | 854.57 | 870.89           | 852.77 |

**Table S7.** Peaks position in O 1s XPS spectrum of NiO<sub>x</sub>H<sub>y</sub> and NiO<sub>x</sub>H<sub>y</sub>-AC-X.

| <b>O 1s</b>                                | <b>Ni-OH</b><br>position | <b>V<sub>o</sub></b><br>position | <b>Ni-O</b><br>position |
|--------------------------------------------|--------------------------|----------------------------------|-------------------------|
| <b>NiO<sub>x</sub>H<sub>y</sub></b>        | 531.57                   | 529.92                           | 528.10                  |
| <b>NiO<sub>x</sub>H<sub>y</sub>-AC-1 V</b> | 531.36                   | 529.60                           | 528.00                  |
| <b>NiO<sub>x</sub>H<sub>y</sub>-AC-2 V</b> | 532.19                   | 530.45                           | 528.43                  |
| <b>NiO<sub>x</sub>H<sub>y</sub>-AC-4 V</b> | 531.30                   | 529.81                           | 528.00                  |

**Table S8.** Peaks position of Ni 2p XPS spectra of NiO<sub>x</sub>H<sub>y</sub> at different etching degree.

| Ni 2p         | Satellite |        | Ni <sup>3+</sup> |        | Ni <sup>2+</sup> |        | Ni <sup>0</sup> |        |
|---------------|-----------|--------|------------------|--------|------------------|--------|-----------------|--------|
|               | position  |        | position         |        | position         |        | position        |        |
| <b>10 nm</b>  | 878.72    | 860.11 | 873.12           | 855.24 | 871.23           | 853.18 | 869.50          | 851.61 |
| <b>50 nm</b>  | 877.96    | 860.15 | 873.36           | 855.32 | 871.35           | 853.43 | 869.46          | 852.06 |
| <b>100 nm</b> | 876.82    | 860.15 | 873.12           | 855.48 | 871.43           | 853.59 | 869.46          | 852.14 |



**Table S9.** Peaks position of Ni 2p XPS spectra of NiO<sub>x</sub>H<sub>y</sub>-AC-4 V at different etching degree.

| Ni 2p         | Satellite |        | Ni <sup>3+</sup> |        | Ni <sup>2+</sup> |        | Ni <sup>0</sup> |        |
|---------------|-----------|--------|------------------|--------|------------------|--------|-----------------|--------|
|               | position  |        | position         |        | position         |        | position        |        |
| <b>10 nm</b>  | 878.68    | 860.35 | 873.81           | 855.32 | 871.79           | 853.22 | 869.86          | 851.65 |
| <b>50 nm</b>  | 879.08    | 860.43 | 873.81           | 855.44 | 871.87           | 853.47 | 869.66          | 851.97 |
| <b>100 nm</b> | 878.31    | 860.47 | 873.81           | 855.56 | 871.83           | 853.55 | 869.58          | 852.06 |

**Table S10.** Peaks position of O 1s XPS spectra of NiO<sub>x</sub>H<sub>y</sub> at different etching degree.

| <b>O 1s</b>   | <b>V<sub>o</sub></b><br>position | <b>Ni-O</b><br>position |
|---------------|----------------------------------|-------------------------|
| <b>10 nm</b>  | 530.81                           | 529.08                  |
| <b>50 nm</b>  | 530.81                           | 529.20                  |
| <b>100 nm</b> | 530.81                           | 529.30                  |

**Table S11.** Peaks position of Ni 2p XPS spectra of NiO<sub>x</sub>H<sub>y</sub>-AC-4 V at different etching degree.

| O 1s   | V <sub>o</sub><br>position | Ni-O<br>position |
|--------|----------------------------|------------------|
| 10 nm  | 530.84                     | 529.00           |
| 50 nm  | 530.98                     | 529.21           |
| 100 nm | 531.03                     | 529.28           |

## REFERENCES

- 1 X. Li, M. Ahmadi, L. Collins and S. V. Kalinin, *Electrochim. Acta*, 2019, **313**, 570-583.
- 2 H. N. Nong, L. J. Falling, A. Bergmann, M. Klingenhof, H. P. Tran, C. Spori, R. Mom, J. Timoshenko, G. Zichittella, A. Knop-Gericke, S. Piccinin, J. Perez-Ramirez, B. R. Cuenya, R. Schlogl, P. Strasser, D. Teschner and T. E. Jones, *Nature*, 2020, **587**, 408-413.
- 3 C. I. Drexler, T. C. Miller, B. A. Rogers, Y. C. Li, C. A. Daly, Jr., T. Yang, S. A. Corcelli and P. S. Cremer, *J. Am. Chem. Soc.*, 2019, **141**, 6930-6936.
- 4 Y. Duan, N. Dubouis, J. Huang, D. A. Dalla Corte, V. Pimenta, Z. J. Xu and A. Grimaud, *ACS Catal.*, 2020, **10**, 4160-4170.
- 5 R. Zhang, W. Liu, F.-M. Zhang, Z.-D. Yang, G. Zhang and X. C. Zeng, *Appl. Catal., B*, 2023, **325**, 122366.
- 6 Y. Pan, X. Wang, W. Zhang, L. Tang, Z. Mu, C. Liu, B. Tian, M. Fei, Y. Sun, H. Su, L. Gao, P. Wang, X. Duan, J. Ma and M. Ding, *Nat. Commun.*, 2022, **13**, 3063.
- 7 R. Urrego-Ortiz, S. Builes and F. Calle-Vallejo, *ACS Catal.*, 2022, **12**, 4784-4791.
